# Supplementary material for: Simple analytical model reveals the functional role of embodied sensorimotor interaction in hexapod gaits
Source: PLOS journal article supplement (doi:10.1371/journal.pone.0192469), 2018-02-28
Supplement: S3 (10.1371/journal.pone.0192469.s003) [file journal.pone.0192469.s003]

## S1 Appendix Effect of the phase interaction between left and right on the phase resetting

In this appendix, we show how assumptions A6 and 7 influence sensory feedback by phase resetting in the phase dynamics (6).

From assumption A7 ( $\tau = 0$ ), the phase dynamics for the left and right legs becomes

$$\begin{aligned}\dot{\phi}_r &= \omega - k_c \sin(\phi_r - \phi_l - \pi) + k_f^r, \\ \dot{\phi}_l &= \omega - k_c \sin(\phi_l - \phi_r - \pi) + k_f^l,\end{aligned}\tag{S1.1}$$

where  $(r, l) = \{(1, 4), (2, 5), (3, 6)\}$ . When phase resetting does not occur ( $k_f^r = k_f^l = 0$ ), these equations yield

$$\frac{d}{dt}(\phi_r - \phi_l) = -2k_c \sin(\phi_r - \phi_l - \pi).\tag{S1.2}$$

Then, the relative phase  $\phi_r - \phi_l$  is given by the first order approximation about  $\phi_r - \phi_l = \pi$  as follows:

$$\phi_r(t) - \phi_l(t) = (\phi_r(t_o) - \phi_l(t_o) - \pi) e^{-2k_c(t-t_o)} + \pi.\tag{S1.3}$$

We suppose that phase resetting occurs for  $\phi_r$  at  $t = t_o$  and that  $\phi_r(t_o^-) = 2\pi - \Delta$  and  $\phi_l(t_o^-) = \pi - \Delta$  from the assumption A6, where  $t = t_o^-$  is the time immediately before  $t = t_o$  and  $\Delta \ll 1$ . Then, phase resetting yields  $\phi_r(t_o^+) = 0$  and  $\phi_l(t_o^+) = \pi - \Delta$ , where  $t = t_o^+$  is the time immediately after  $t = t_o$  and  $\Delta$  corresponds to the phase reset value. Because  $\phi_r(t_o^+) - \phi_l(t_o^+) = \Delta + \pi \in [0, 2\pi)$  and  $\Delta \ll 1$ , the relative phase  $\phi_r(t) - \phi_l(t)$  after the phase resetting is given using (S1.3) by

$$\phi_r(t) - \phi_l(t) = \Delta e^{-2k_c(t-t_o)} + \pi, \quad t > t_o.\tag{S1.4}$$

Then, substituting (S1.4) for (S1.1), the phase dynamics of  $\phi_r$  are given by

$$\dot{\phi}_r = \omega - k_c \sin(\Delta e^{-2k_c(t-t_o)}) + k_f^r, \quad t > t_o.\tag{S1.5}$$

Until the next phase resetting occurs,  $\phi_r$  can be written as a first order approximation of  $\Delta$  as follows:

$$\phi_r = \omega(t - t_o) + \frac{1}{2}\Delta e^{-2k_c(t-t_o)} - \frac{1}{2}\Delta, \quad t > t_o.\tag{S1.6}$$

After a sufficient duration ( $\gg 1/k_c$ ) after phase resetting,  $\phi_r$  becomes  $\omega(t - t_o) - \frac{1}{2}\Delta$ . This means that assumptions A6 and A7 reduce the phase reset value from  $\Delta$  to  $\frac{1}{2}\Delta$ . Therefore, we used the coefficient 1/2 for the phase resetting term  $k_f$  in (21).
